# Supplementary material for: Diplopia Is Frequent and Associated with Motor and Non-Motor Severity in Parkinson’s Disease: Results from the COPPADIS Cohort at 2-Year Follow-Up
Source: MDPI journal article supplement (doi:10.3390/diagnostics11122380), 2021-12-17
Supplement: s1 [file s1]

| <b>Name (Last Name, First Name)</b> | <b>Location</b>                                                                                           | <b>Role</b>          | <b>Contribution</b>                                                             |
|-------------------------------------|-----------------------------------------------------------------------------------------------------------|----------------------|---------------------------------------------------------------------------------|
| Astrid Adarmes, Daniela             | Hospital Universitario Virgen del Rocío, Sevilla, Spain                                                   | Site investigator    | Evaluation of participants and/or data management                               |
| Almeria, Marta                      | Hospital Universitari Mutua de Terrassa, Terrassa, Barcelona, Spain                                       | Site investigator    | Neuropsychologist; evaluation of participants                                   |
| Alonso Losada, Maria Gema           | Hospital Álvaro Cunqueiro, Complejo Hospitalario Universitario de Vigo (CHUVI), Vigo, Spain               | Site investigator/PI | Coordination at the center<br>Evaluation of participants and/or data management |
| Alonso Cánovas, Araceli             | Hospital Universitario Ramón y Cajal, Madrid, Spain                                                       | Site investigator    | Evaluation of participants and/or data management                               |
| Alonso Frech, Fernando              | Hospital Universitario Clínico San Carlos, Madrid, Spain                                                  | Site investigator    | Evaluation of participants and/or data management                               |
| Alonso Redondo, Ruben               | Hospital Universitario Lucus Augusti (HULA), Lugo, Spain                                                  | Site investigator/PI | Coordination at the center<br>Evaluation of participants and/or data management |
| Aneiros Díaz, Ángel                 | Complejo Hospitalario Universitario de Ferrol (CHUF), Ferrol, A Coruña, Spain                             | Site investigator/PI | Coordination at the center<br>Evaluation of participants and/or data management |
| Álvarez, Ignacio                    | Hospital Universitari Mutua de Terrassa, Terrassa, Barcelona, Spain                                       | Site investigator    | Evaluation of participants and/or data management                               |
| Álvarez Saucó, María                | Hospital General Universitario de Elche, Elche, Spain                                                     | Site investigator/PI | Coordination at the center<br>Evaluation of participants and/or data management |
| Arnáiz, Sandra                      | Complejo Asistencial Universitario de Burgos, Burgos, Spain                                               | Site investigator    | Evaluation of participants and/or data management                               |
| Arribas, Sonia                      | Hospital Universitari Mutua de Terrassa, Terrassa, Barcelona, Spain                                       | Site investigator    | Neuropsychologist; evaluation of participants                                   |
| Ascunce Vidondo, Arancha            | Complejo Hospitalario de Navarra, Pamplona, Spain                                                         | Site investigator    | Evaluation of participants and/or data management                               |
| Aguilar, Miquel                     | Hospital Universitari Mutua de Terrassa, Terrassa, Barcelona, Spain                                       | Site investigator    | Evaluation of participants and/or data management                               |
| Ávila Rivera, Maria Asunción        | Consorci Sanitari Integral, Hospital General de L'Hospitalet, L'Hospitalet de Llobregat, Barcelona, Spain | Site investigator/PI | Coordination at the center<br>Evaluation of participants and/or data management |
| Bernardo Lambrich, Noemí            | Hospital de Tortosa Verge de la Cinta (HTVC), Tortosa, Tarragona, Spain                                   | Site investigator    | Evaluation of participants and/or data management                               |
| Bejr-Kasem, Helena                  | Hospital de Sant Pau, Barcelona, Spain                                                                    | Site investigator    | Evaluation of participants and/or data management                               |
| Blázquez Estrada, Marta             | Hospital Universitario Central de Asturias, Oviedo, Spain                                                 | Site investigator    | Evaluation of participants and/or data management                               |
| Botí González, Maria Ángeles        | Hospital Universitari Mutua de Terrassa, Terrassa, Barcelona, Spain                                       | Site investigator    | Neuropsychologist; evaluation of participants                                   |
| Borrué, Carmen                      | Hospital Infanta Sofía, Madrid, Spain                                                                     | Site investigator/PI | Coordination at the center<br>Evaluation of participants and/or data management |
| Buongiorno, Maria Teresa            | Hospital Universitari Mutua de Terrassa, Terrassa, Barcelona, Spain                                       | Site investigator    | Nurse study coordinator                                                         |
| Cabello González, Carolina          | Complejo Hospitalario de Navarra, Pamplona, Spain                                                         | Site investigator    | Scheduling of evaluations                                                       |
| Cabo López, Iria                    | Complejo Hospitalario Universitario de Pontevedra (CHOP), Pontevedra, Spain                               | Site investigator/PI | Coordination at the center<br>Evaluation of participants and/or data management |
| Caballol, Nuria                     | Consorci Sanitari Integral,                                                                               | Site investigator/PI | Coordination at the center                                                      |

|                                  |                                                                                               |                      |                                                                                 |
|----------------------------------|-----------------------------------------------------------------------------------------------|----------------------|---------------------------------------------------------------------------------|
|                                  | Hospital Moisès Broggi, Sant Joan Despí, Barcelona, Spain.                                    |                      | Evaluation of participants and/or data management                               |
| Cámara Lorenzo, Ana              | Hospital Clínic de Barcelona, Barcelona, Spain                                                | Site investigator    | Nurse study coordinator                                                         |
| Canfield Medina, Héctor          | Complejo Hospitalario Universitario de Ferrol (CHUF), Ferrol, A Coruña, Spain                 | Site investigator    | Evaluation of participants and/or data management                               |
| Carrillo, Fátima                 | Hospital Universitario Virgen del Rocío, Sevilla, Spain                                       | Site investigator    | Evaluation of participants and/or data management                               |
| Carrillo Padilla, Francisco José | Hospital Universitario de Canarias, San Cristóbal de la Laguna, Santa Cruz de Tenerife, Spain | Site investigator/PI | Coordination at the center<br>Evaluation of participants and/or data management |
| Casas, Elena                     | Complejo Asistencial Universitario de Burgos, Burgos, Spain                                   | Site investigator    | Evaluation of participants and/or data management                               |
| Catalán, Maria José              | Hospital Universitario Clínico San Carlos, Madrid, Spain                                      | Site investigator/PI | Coordination at the center<br>Evaluation of participants and/or data management |
| Clavero, Pedro                   | Complejo Hospitalario de Navarra, Pamplona, Spain                                             | Site investigator    | Evaluation of participants and/or data management                               |
| Cortina Fernández, A             | Complejo Hospitalario Universitario de Ferrol (CHUF), Ferrol, A Coruña, Spain                 | Site investigator    | Coordination of blood extractions                                               |
| Cosgaya, Marina                  | Hospital Clínic de Barcelona, Barcelona, Spain                                                | Site investigator    | Evaluation of participants and/or data management                               |
| Cots Foraster, Anna              | Institut d'Assistència Sanitària (IAS)—Institutí Català de la Salut. Girona, Spain            | Site investigator    | Evaluation of participants and/or data management                               |
| Crespo Cuevas, Ane               | Hospital del Mar, Barcelona, Spain.                                                           | Site investigator    | Evaluation of participants and/or data management                               |
| Cubo, Esther                     | Complejo Asistencial Universitario de Burgos, Burgos, Spain                                   | Site investigator/PI | Coordination at the center<br>Evaluation of participants and/or data management |
| De Deus Fonticoba, Teresa        | Complejo Hospitalario Universitario de Ferrol (CHUF), Ferrol, A Coruña, Spain                 | Site investigator    | Nurse study coordinator<br>Evaluation of participants and/or data management    |
| De Fábregues-Boixar, Oriol       | Hospital Universitario Vall d'Hebron, Barcelona, Spain                                        | Site investigator/PI | Coordination at the center<br>Evaluation of participants and/or data management |
| Díez Fairen, M                   | Hospital Universitari Mutua de Terrassa, Terrassa, Barcelona, Spain                           | Site investigator    | Evaluation of participants and/or data management                               |
| Dotor García-Soto, Julio         | Hospital Universitario Virgen Macarena, Sevilla, Spain                                        | Site investigator/PI | Evaluation of participants and/or data management                               |
| Erro, Elena                      | Complejo Hospitalario de Navarra, Pamplona, Spain                                             | Site investigator    | Evaluation of participants and/or data management                               |
| Escalante, Sonia                 | Hospital de Tortosa Verge de la Cinta (HTVC), Tortosa, Tarragona, Spain                       | Site investigator/PI | Coordination at the center<br>Evaluation of participants and/or data management |
| Estelrich Peyret, Elena          | Institut d'Assistència Sanitària (IAS)—Institutí Català de la Salut. Girona, Spain            | Site investigator    | Evaluation of participants and/or data management                               |
| Fernández Guillán, Noelia        | Complejo Hospitalario Universitario de Ferrol (CHUF), Ferrol, A Coruña, Spain                 | Site investigator    | Neuroimaging studies                                                            |
| Gámez, Pedro                     | Complejo Asistencial Universitario de Burgos, Burgos, Spain                                   | Site investigator    | Evaluation of participants and/or data management                               |
| Gallego, Mercedes                | Hospital La Princesa, Madrid, Spain                                                           | Site investigator    | Evaluation of participants and/or data management                               |
| García Caldentey, Juan           | Centro Neurológico Oms 42, Palma de Mallorca, Spain                                           | Site investigator/PI | Coordination at the center<br>Evaluation of participants and/or data management |
| García Campos, Cristina          | Hospital Universitario Virgen                                                                 | Site investigator    | Evaluation of participants                                                      |

|                                  |                                                                                               |                                     |                                                                                 |
|----------------------------------|-----------------------------------------------------------------------------------------------|-------------------------------------|---------------------------------------------------------------------------------|
|                                  | Macarena, Sevilla, Spain                                                                      |                                     | and/or data management                                                          |
| García Moreno, Jose Manuel       | Hospital Universitario Virgen Macarena, Sevilla, Spain                                        | Site investigator/PI (until MAR/21) | Coordination at the center<br>Evaluation of participants and/or data management |
| Gastón, Itziar                   | Complejo Hospitalario de Navarra, Pamplona, Spain                                             | Site investigator/PI                | Coordination at the center<br>Evaluation of participants and/or data management |
| Gómez Garre, María del Pilar     | Hospital Universitario Virgen del Rocío, Sevilla, Spain                                       | Site investigator                   | Genetic studies coordination                                                    |
| Gómez Mayordomo, Víctor          | Hospital Clínico San Carlos, Madrid, Spain                                                    | Site investigator                   | Evaluation of participants and/or data management                               |
| González Aloy, Javier            | Institut d'Assistència Sanitària (IAS)—Institutí Català de la Salut. Girona, Spain            | Site investigator                   | Evaluation of participants and/or data management                               |
| González Aramburu, Isabel        | Hospital Universitario Marqués de Valdecilla, Santander, Spain                                | Site investigator                   | Evaluation of participants and/or data management                               |
| González Ardura, Jessica         | Hospital Universitario Lucus Augusti (HULA), Lugo, Spain                                      | Site investigator/PI (until FEB/21) | Evaluation of participants and/or data management                               |
| González García, Beatriz         | Hospital La Princesa, Madrid, Spain                                                           | Site investigator                   | Nurse study coordinator                                                         |
| González Palmás, Maria Josefa    | Complejo Hospitalario Universitario de Pontevedra (CHOP), Pontevedra, Spain                   | Site investigator                   | Evaluation of participants and/or data management                               |
| González Toledo, Gabriel Ricardo | Hospital Universitario de Canarias, San Cristóbal de la Laguna, Santa Cruz de Tenerife, Spain | Site investigator                   | Evaluation of participants and/or data management                               |
| Golpe Díaz, Ana                  | Complejo Hospitalario Universitario de Ferrol (CHUF), Ferrol, A Coruña, Spain                 | Site investigator                   | Laboratory analysis coordination                                                |
| Grau Solá, Mireia                | Consorci Sanitari Integral, Hospital Moisès Broggi, Sant Joan Despí, Barcelona, Spain         | Site investigator                   | Evaluation of participants and/or data management                               |
| Guardia, Gemma                   | Hospital Universitari Mutua de Terrassa, Terrassa, Barcelona, Spain                           | Site investigator                   | Evaluation of participants and/or data management                               |
| Hernández Vara, Jorge            | Hospital Universitario Vall d'Hebron, Barcelona, Spain                                        | Site investigator/PI                | Coordination at the center<br>Evaluation of participants and/or data management |
| Horta Barba, Andrea              | Hospital de Sant Pau, Barcelona, Spain                                                        | Site investigator                   | Neuropsychologist; evaluation of participants                                   |
| Idoate Calderón, Daniel          | Complejo Hospitalario Universitario de Pontevedra (CHOP), Pontevedra, Spain                   | Site investigaor                    | neuropsychologist; evaluation of participants                                   |
| Infante, Jon                     | Hospital Universitario Marqués de Valdecilla, Santander, Spain                                | Site investigator/PI                | Coordination at the center<br>Evaluation of participants and/or data management |
| Jesús, Silvia                    | Hospital Universitario Virgen del Rocío, Sevilla, Spain                                       | Site investigator                   | Evaluation of participants and/or data management                               |
| Kulisevsky, Jaime                | Hospital de Sant Pau, Barcelona, Spain                                                        | Site investigator/PI                | Coordination at the center<br>Evaluation of participants and/or data management |
| Kurtis, Mónica                   | Hospital Ruber Internacional, Madrid, Spain                                                   | Site investigator/PI                | Coordination at the center<br>Evaluation of participants and/or data management |
| Labandeira, Carmen               | Hospital Álvaro Cunqueiro, Complejo Hospitalario Universitario de Vigo (CHUVI), Vigo, Spain   | Site investigator                   | Evaluation of participants and/or data management                               |
| Labrador Espinosa, Miguel Ángel  | Hospital Universitario Virgen del Rocío, Sevilla, Spain                                       | Site investigator                   | Neuroimaging data analysis                                                      |
| Lacruz, Francisco                | Complejo Hospitalario de Navarra, Pamplona, Spain                                             | Site investigator                   | Evaluation of participants and/or data management                               |
| Lage Castro, Melva               | Complejo Hospitalario Universitario de Pontevedra                                             | Site investigator                   | Evaluation of participants and/or data management                               |

|                                 |                                                                                    |                                                  |                                                                                 |
|---------------------------------|------------------------------------------------------------------------------------|--------------------------------------------------|---------------------------------------------------------------------------------|
|                                 | (CHOP), Pontevedra, Spain                                                          |                                                  |                                                                                 |
| Lastres Gómez, Sonia            | Complejo Hospitalario Universitario de Pontevedra (CHOP), Pontevedra, Spain        | Site investigator                                | Neuropsychologist; evaluation of participants                                   |
| Legarda, Inés                   | Hospital Universitario Son Espases, Palma de Mallorca, Spain                       | Site investigator/PI                             | Coordination at the center<br>Evaluation of participants and/or data management |
| López Ariztegui, Nuria          | Complejo Hospitalario de Toledo, Toledo, Spain                                     | Site investigator/PI                             | Evaluation of participants and/or data management                               |
| López Díaz, Luis Manuel         | Hospital Da Costa de Burela, Lugo, Spain                                           | Site investigator                                | Evaluation of participants and/or data management                               |
| López Manzanares, Lydia         | Hospital La Princesa, Madrid, Spain                                                | Site investigator/PI                             | Coordination at the center<br>Evaluation of participants and/or data management |
| López Seoane, Balbino           | Complejo Hospitalario Universitario de Ferrol (CHUF), Ferrol, A Coruña, Spain      | Site investigator                                | Neuroimaging studies                                                            |
| Lucas del Pozo, Sara            | Hospital Universitario Vall d'Hebron, Barcelona, Spain                             | Site investigator                                | Evaluation of participants and/or data management                               |
| Macías, Yolanda                 | Fundación Hospital de Alcorcón, Madrid, Spain                                      | Site investigator                                | Evaluation of participants and/or data management                               |
| Madrigal Lkhou, Elisabet        | Complejo Asistencial Universitario de Burgos, Burgos, Spain                        | Site Investigator                                | Evaluation of participants and/or data management                               |
| Mata, Marina                    | Hospital Infanta Sofía, Madrid, Spain                                              | Site investigator                                | Evaluation of participants and/or data management                               |
| Martí Andres, Gloria            | Hospital Universitario Vall d'Hebron, Barcelona, Spain                             | Site investigator                                | Evaluation of participants and/or data management                               |
| Martí, Maria José               | Hospital Clínic de Barcelona, Barcelona, Spain                                     | Site investigator/PI                             | Coordination at the center<br>Evaluation of participants and/or data management |
| Martínez Castrillo, Juan Carlos | Hospital Universitario Ramón y Cajal, Madrid, Spain                                | Site investigator /PI                            | Coordination at the center<br>Evaluation of participants and/or data management |
| Martinez-Martin, Pablo          | Centro Nacional de Epidemiología y CIBERNED, Instituto de Salud Carlos III. Madrid | Collaborator in statistical and methods analysis | Methods and statistical reviewer                                                |
| McAfee, Darrian                 | University Maryland School of Medicine, Maryland United States of America          | Collaborator in english style                    | English style reviewer                                                          |
| Meitín, Maria Teresa            | Hospital Da Costa de Burela, Lugo, Spain                                           | Site investigator                                | Evaluation of participants and/or data management                               |
| Menéndez González, Manuel       | Hospital Universitario Central de Asturias, Oviedo, Spain                          | Site investigator/PI                             | Coordination at the center<br>Evaluation of participants and/or data management |
| Méndez del Barrio, Carlota      | Hospital Universitario Virgen del Rocío, Sevilla, Spain                            | Site investigator                                | Evaluation of participants and/or data management                               |
| Mir, Pablo                      | Hospital Universitario Virgen del Rocío, Sevilla, Spain                            | Site investigator/PI                             | Coordination at the center<br>Evaluation of participants and/or data management |
| Miranda Santiago, Javier        | Complejo Asistencial Universitario de Burgos, Burgos, Spain                        | Site investigator                                | Evaluation of participants and/or data management                               |
| Morales Casado, Maria Isabel    | Complejo Hospitalario de Toledo, Toledo, Spain.                                    | Site investigator                                | Evaluation of participants and/or data management                               |
| Moreno Diéguez, Antonio         | Complejo Hospitalario Universitario de Ferrol (CHUF), Ferrol, A Coruña, Spain      | Site investigator                                | Neuroimaging studies                                                            |
| Nogueira, Víctor                | Hospital Da Costa de Burela, Lugo, Spain                                           | Site investigator/PI                             | Coordination at the center<br>Evaluation of participants and/or data management |
| Novo Amado, Alba                | Complejo Hospitalario Universitario de Ferrol (CHUF), Ferrol, A Coruña, Spain      | Site investigator                                | Neuroimaging studies                                                            |

|                               |                                                                                               |                                  |                                                                                 |
|-------------------------------|-----------------------------------------------------------------------------------------------|----------------------------------|---------------------------------------------------------------------------------|
| Novo Ponte, Sabela            | Hospital Universitario Puerta de Hierro, Madrid, Spain.                                       | Site investigator                | Evaluation of participants and/or data management                               |
| Ordás, Carlos                 | Hospital Rey Juan Carlos, Madrid, Spain, Madrid, Spain.                                       | Site Investigator                | Evaluation of participants and/or data management                               |
| Pagonabarraga, Javier         | Hospital de Sant Pau, Barcelona, Spain                                                        | Site investigator                | Evaluation of participants and/or data management                               |
| Pareés, Isabel                | Hospital Ruber Internacional, Madrid, Spain                                                   | Site investigator                | Evaluation of participants and/or data management                               |
| Pascual-Sedano, Berta         | Hospital de Sant Pau, Barcelona, Spain                                                        | Site Investigator                | Evaluation of participants and/or data management                               |
| Pastor, Pau                   | Hospital Universitari Mutua de Terrassa, Terrassa, Barcelona, Spain                           | Site investigator                | Evaluation of participants and/or data management                               |
| Pérez Fuertes, Aída           | Complejo Hospitalario Universitario de Ferrol (CHUF), Ferrol, A Coruña, Spain                 | Site investigator                | Blood analysis                                                                  |
| Pérez Noguera, Rafael         | Hospital Universitario Virgen Macarena, Sevilla, Spain                                        | Site investigator                | Evaluation of participants and/or data management                               |
| Planas-Ballvé, Ana            | Consorci Sanitari Integral, Hospital Moisès Broggi, Sant Joan Despí, Barcelona, Spain         | Site investigator                | Evaluation of participants and/or data management                               |
| Planellas, Lluís              | Hospital Clínic de Barcelona, Barcelona, Spain                                                | Site investigator (until DEC/19) | Evaluation of participants and/or data management                               |
| Prats, Marian Ángeles         | Institut d'Assistència Sanitària (IAS)—Institutí Català de la Salut. Girona, Spain            | Site investigator                | Evaluation of participants and/or data management                               |
| Prieto Jurczynska, Cristina   | Hospital Rey Juan Carlos, Madrid, Spain, Madrid, Spain                                        | Site investigator/PI             | Coordination at the center<br>Evaluation of participants and/or data management |
| Puente, Víctor                | Hospital del Mar, Barcelona, Spain                                                            | Site investigator/PI             | Coordination at the center<br>Evaluation of participants and/or data management |
| Pueyo Morlans, Mercedes       | Hospital Universitario de Canarias, San Cristóbal de la Laguna, Santa Cruz de Tenerife, Spain | Site investigator                | Evaluation of participants and/or data management                               |
| Puig Daví, Arnau              | Hospital de Sant Pau, Barcelona, Spain                                                        | Site investigator                | Evaluation of participants and/or data management                               |
| Redondo, Nuria                | Hospital La Princesa, Madrid, Spain                                                           | Site Investigator                | Evaluation of participants and/or data management                               |
| Rodríguez Méndez, Luisa       | Complejo Hospitalario Universitario de Ferrol (CHUF), Ferrol, A Coruña, Spain                 | Site investigator                | Blood analysis                                                                  |
| Rodríguez Pérez, Amparo Belén | Hospital General Universitario de Elche, Elche, Spain                                         | Site investigator                | Evaluation of participants and/or data management                               |
| Roldán, Florinda              | Hospital Universitario Virgen del Rocío, Sevilla, Spain                                       | Site investigator                | Neuroimaging studies                                                            |
| Ruíz de Arcos, María          | Hospital Universitario Virgen Macarena, Sevilla, Spain.                                       | Site investigator                | Evaluation of participants and/or data management                               |
| Ruíz Martínez, Javier         | Hospital Universitario Donostia, San Sebastián, Spain                                         | Site investigator                | Evaluation of participants and/or data management                               |
| Sánchez Alonso, Pilar         | Hospital Universitario Puerta de Hierro, Madrid, Spain                                        | Site investigator                | Evaluation of participants and/or data management                               |
| Sánchez-Carpintero, Macarena  | Complejo Hospitalario Universitario de Ferrol (CHUF), Ferrol, A Coruña, Spain                 | Site investigator                | Neuroimaging studies                                                            |
| Sánchez Díez, Gema            | Hospital Universitario Ramón y Cajal, Madrid, Spain                                           | Site investigator                | Evaluation of participants and/or data management                               |
| Sánchez Rodríguez, Antonio    | Hospital Universitario Marqués de Valdecilla, Santander, Spain                                | Site investigator                | Evaluation of participants and/or data management                               |
| Santacruz, Pilar              | Hospital Clínic de Barcelona, Barcelona, Spain                                                | Site investigator                | Evaluation of participants and/or data management                               |
| Santos García, Diego          | CHUAC, Complejo Hospitalario Universitario de A Coruña                                        | Coordinator of the Project       | Coordination of the COPPADIS-2015                                               |

|                                  |                                                                                               |                      |                                                                                 |
|----------------------------------|-----------------------------------------------------------------------------------------------|----------------------|---------------------------------------------------------------------------------|
| Segundo Rodríguez, José Clemente | Complejo Hospitalario de Toledo, Toledo, Spain                                                | Site investigator    | Evaluation of participants and/or data management                               |
| Seijo, Manuel                    | Complejo Hospitalario Universitario de Pontevedra (CHOP), Pontevedra, Spain                   | Site investigator/PI | Coordination at the center<br>Evaluation of participants and/or data management |
| Sierra, María                    | Hospital Universitario Marqués de Valdecilla, Santander, Spain                                | Site investigator    | Evaluation of participants and/or data management                               |
| Solano, Berta                    | Institut d'Assistència Sanitària (IAS)—Institut Català de la Salut. Girona, Spain             | Site investigator/PI | Coordination at the center<br>Evaluation of participants and/or data management |
| Suárez Castro, Ester             | Complejo Hospitalario Universitario de Ferrol (CHUF), Ferrol, A Coruña, Spain                 | Site investigator    | Evaluation of participants and/or data management                               |
| Tartari, Juan Pablo              | Hospital Universitari Mutua de Terrassa, Terrassa, Barcelona, Spain                           | Site investigator    | Evaluation of participants and/or data management                               |
| Valero, Caridad                  | Hospital Arnau de Vilanova, Valencia, Spain                                                   | Site investigator    | Evaluation of participants and/or data management                               |
| Vargas, Laura                    | Hospital Universitario Virgen del Rocío, Sevilla, Spain                                       | Site investigator    | Evaluation of participants and/or data management                               |
| Vela, Lydia                      | Fundación Hospital de Alcorcón, Madrid, Spain                                                 | Site investigator/PI | Coordination at the center<br>Evaluation of participants and/or data management |
| Villanueva, Clara                | Hospital Universitario Clínico San Carlos, Madrid, Spain                                      | Site investigator    | Evaluation of participants and/or data management                               |
| Vives, Bárbara                   | Hospital Universitario Son Espases, Palma de Mallorca, Spain                                  | Site investigator    | Evaluation of participants and/or data management                               |
| Villar, Maria Dolores            | Hospital Universitario de Canarias, San Cristóbal de la Laguna, Santa Cruz de Tenerife, Spain | Site investigator    | Evaluation of participants and/or data management                               |
